# Supplementary material for: Robust dihydroxyacetone production via photoelectrochemical glycerol oxidation using an oxygen vacant BiVO4 photoanode
Source: Royal Society of Chemistry journal article supplement (doi:10.1039/d4tc04085f), 2024-11-12
Supplement: d4tc04085f1.pdf [file d4tc04085f1.pdf]

1

**Electronic supplementary information**

2

3 **Robust Dihydroxyacetone Production via Photoelectrochemical**  
4 **Glycerol Oxidation using Oxygen Vacant BiVO<sub>4</sub> Photoanode**

5

6 Yeji Lee,<sup>‡a</sup> Yeseul Jo<sup>‡a</sup> and Youn Jeong Jang<sup>a\*</sup>

7 <sup>a</sup>Department of Chemical Engineering, Hanyang University, Seoul 04763, Korea

8 <sup>‡</sup> Yeji Lee and Yeseul Jo contributed equally to this work.

9

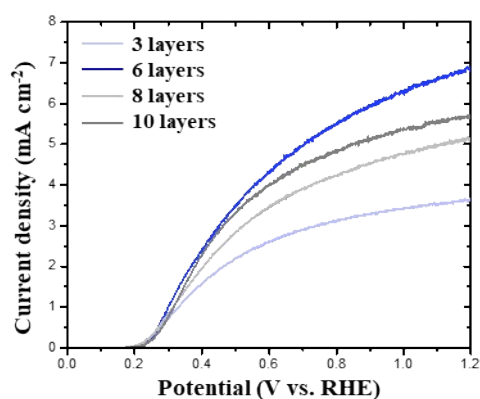

10

11 **Fig. S1** Photoelectrochemical J-V characteristics of BiVO<sub>4</sub> in different cycles in 0.5 M Na<sub>2</sub>SO<sub>3</sub> with 0.1 M borate  
 12 buffer (pH 9.3, adjusted by 0.1M NaOH).

13

14

15 **Table S1** Calculation of theoretical redox potential for glycerol to DHA.<sup>1</sup>

| $\Delta G_f$ (C <sub>3</sub> H <sub>8</sub> O <sub>3</sub> )<br>(kJ mol <sup>-1</sup> ) | $\Delta G_f$ (C <sub>3</sub> H <sub>6</sub> O <sub>3</sub> )<br>(kJ mol <sup>-1</sup> ) | E° <sub>Anode</sub><br>(V vs. NHE) | E° <sub>Cathode</sub><br>(V vs. NHE) |
|-----------------------------------------------------------------------------------------|-----------------------------------------------------------------------------------------|------------------------------------|--------------------------------------|
| -478.6                                                                                  | -428.18                                                                                 | 0.26                               | 0                                    |

16 Standard Gibb's free energy and redox potential of reaction for the GOR to DHA coupled with the HER were  
 17 calculated based on the above data.

18 For anode reaction (GOR):

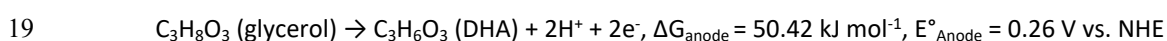

20 For cathode reaction (HER):

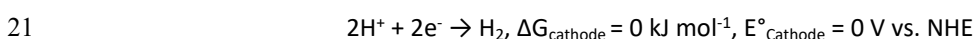

22 For overall reaction using E°<sub>Cell</sub> = E°<sub>Cathode</sub> - E°<sub>Anode</sub>

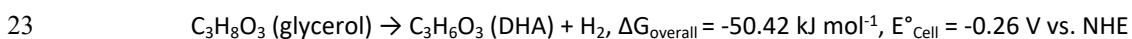

24 Equation  $\Delta G^\circ = nFE^\circ_{Cell}$  is used to calculate E°<sub>Cell</sub>, where n is the number of electrons transferred and F is the  
 25 Faraday constant (96485 C mol<sup>-1</sup>). All thermodynamic properties are reported under standard conditions (1 bar  
 26 and 298 K).

27

28

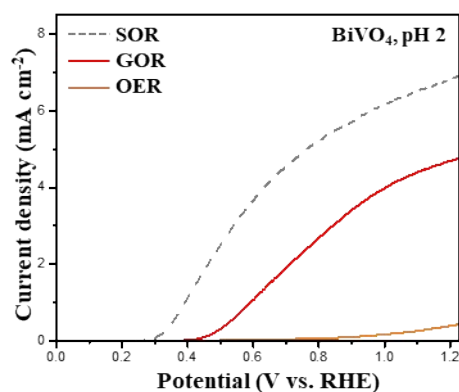

29

30 **Fig. S2** Photoelectrochemical J-V characteristics of BiVO<sub>4</sub> in different oxidation reactions at pH 2.

31

32

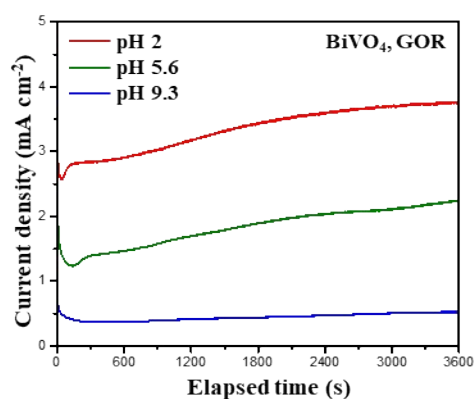

33

34 **Fig. S3** Chronoamperometric curves on BiVO<sub>4</sub> in 0.5 M Na<sub>2</sub>SO<sub>4</sub> with 0.1 M glycerol under 1.0 V vs. RHE at pH 2,  
35 pH 5.6, and pH 9.3.

36 The J-t curves in Fig. S3 demonstrated that photocurrent density initially decreased after first illumination at  
37 pH 2 pH 5.6, and pH 9.3, which can be attributed to the accumulation of holes at the BiVO<sub>4</sub> surface and the  
38 relatively slow interfacial charge transfer compared to charge recombination.<sup>2</sup> As the illumination progresses,  
39 the photocurrent density gradually increased, resulting from time-dependent photoactivation during water  
40 and glycerol oxidation.<sup>3</sup>

41

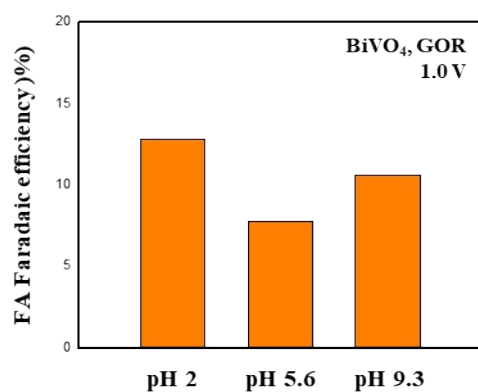

42

43 **Fig. S4** FEs of FA under 1.0 V vs. RHE at pH 2, pH 5.6, and pH 9.3.

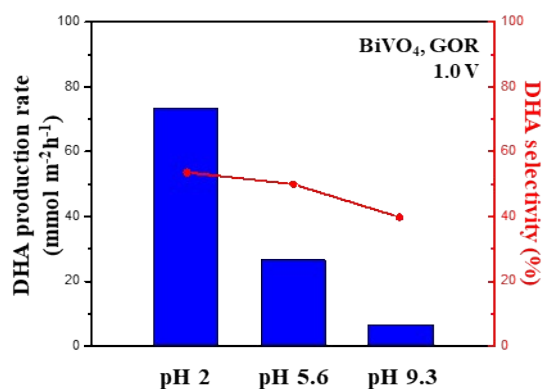

44

45 **Fig. S5** Production rates and selectivities of DHA under 1.0 V vs. RHE at pH 2, pH 5.6, and pH 9.3.

46

47

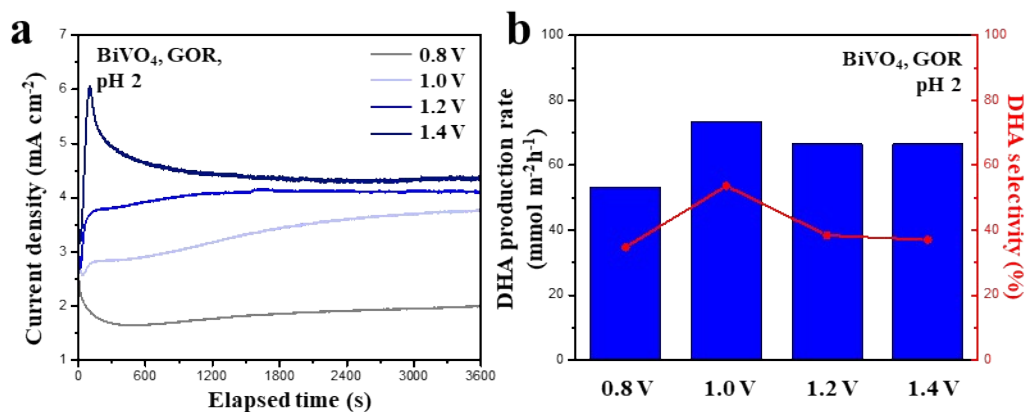

48

49 **Fig. S6** (a) Chronoamperometric curves on BiVO<sub>4</sub>, and (b) Production rates and selectivities of DHA at pH 2  
50 under 0.8, 1.0, 1.2, and 1.4 V vs. RHE.

51

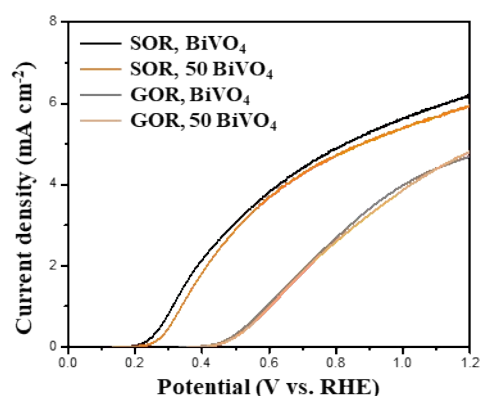

52

53 **Fig. S7** Photoelectrochemical J-V characteristics of  $\text{BiVO}_4$  and  $50 \text{ BiVO}_4$  for sulfite oxidation (pH 9.3) and  
 54 glycerol oxidation (pH 2).

55 A thermal treatment below  $150^\circ\text{C}$  was insufficient for modifying  $\text{BiVO}_4$ , as it exerted minimal influence on the  
 56 formation of oxygen vacancies, bulk efficiency of  $\text{BiVO}_4$ , and the charge transfer dynamics for glycerol  
 57 oxidation.

58

59

60

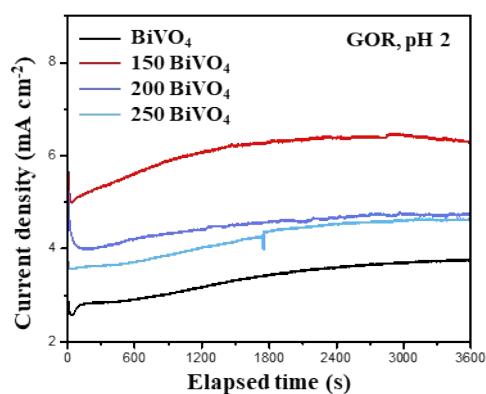

61

62 **Fig. S8** Chronoamperometric curves on  $\text{BiVO}_4$  and  $X \text{ BiVO}_4$  ( $X=\text{N}_2$ -annealing temperature) in  $0.5 \text{ M Na}_2\text{SO}_4$  with  
 63  $0.1 \text{ M}$  glycerol under  $1.0 \text{ V vs. RHE}$  at pH 2.

64

65

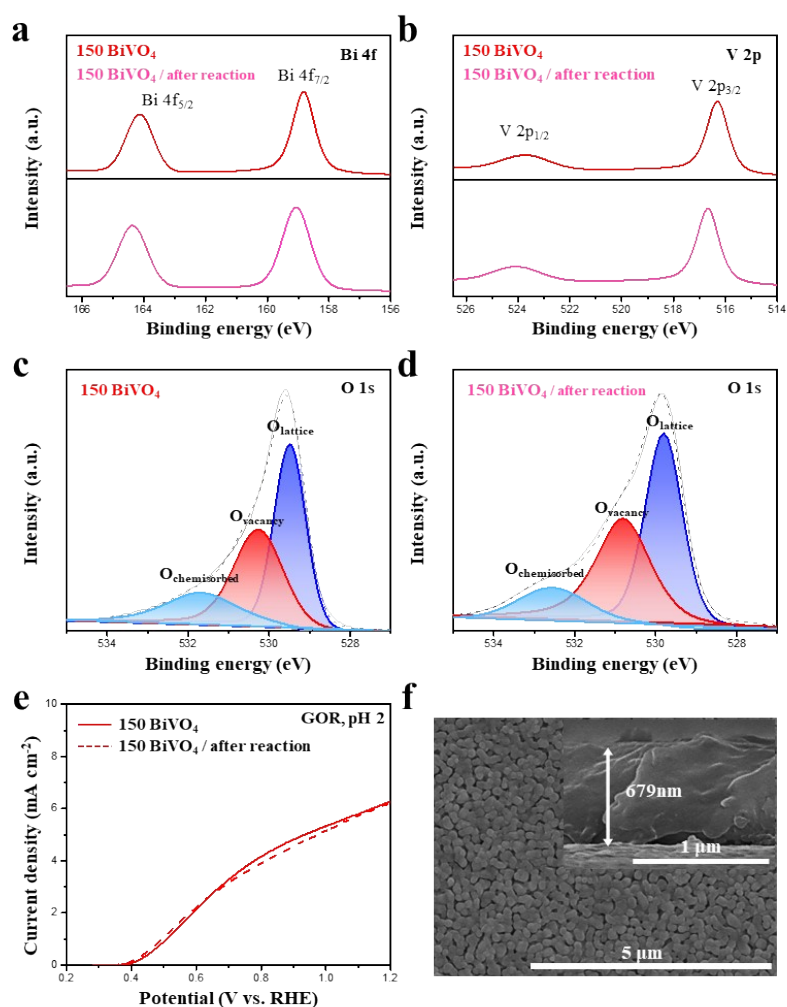

66

67 **Fig. S9** Analysis of 150 BiVO<sub>4</sub> before and after glycerol oxidation at pH 2 under 1.0 V vs. RHE for 1 hour (Fig. S8).  
 68 XPS spectra of (a) Bi 4f, (b) V 2p, and (c-d) O 1s for 150 BiVO<sub>4</sub>. (e) Photoelectrochemical J-V curves of 150 BiVO<sub>4</sub>  
 69 before and after reaction. (f) FE-SEM image of 150 BiVO<sub>4</sub> after reaction.

70

71 Following a chronoamperometric measurement for 1 hour on 150 BiVO<sub>4</sub> for glycerol oxidation under 1.0 V vs.  
 72 RHE at pH 2, XPS results showed no new shoulder peaks for Bi 4f, V 2p, and O 1s, confirming that the  
 73 composition of BiVO<sub>4</sub> remained well-preserved (Fig. S9(a-d)). J-V analysis was conducted to assess glycerol  
 74 oxidation performance for 150 BiVO<sub>4</sub> after reaction for 1 hour, with no changes observed (Fig. S9(e)). Also, the  
 75 condensed morphology with minor pores between crystallites was preserved, showing no significant signs of  
 76 corrosion or degradation compared to the 150 BiVO<sub>4</sub> before the reaction (Fig. S9(f)).

77 As a result, the chemical states of the elements constituting BiVO<sub>4</sub> were preserved, indicating that the  
 78 oxidation reaction for 1 hour did not cause significant damage to the BiVO<sub>4</sub> film. Additionally, the Pourbaix  
 79 diagram of BiVO<sub>4</sub> indicates that BiVO<sub>4</sub> film remains in a stable solid-state, maintaining its integrity in  
 80 an aqueous solution under 1.0 V vs. RHE at pH 2.<sup>4</sup> Meanwhile, the slight decrease observed in  
 81 the chronoamperometric curve of 150 BiVO<sub>4</sub> after 3000 s is attributed to changes in the distribution and  
 82 concentration gradients of reactants and products within the electrolyte.

83

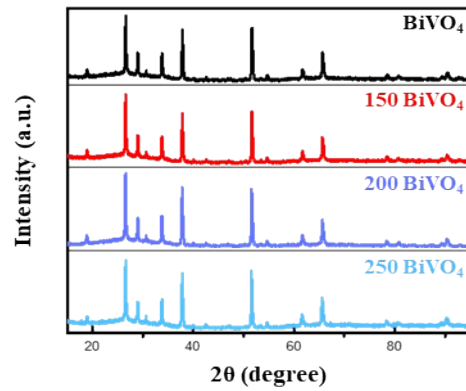

84

85 **Fig. S10** XRD patterns of  $\text{BiVO}_4$  and  $X \text{ BiVO}_4$ .

86

87

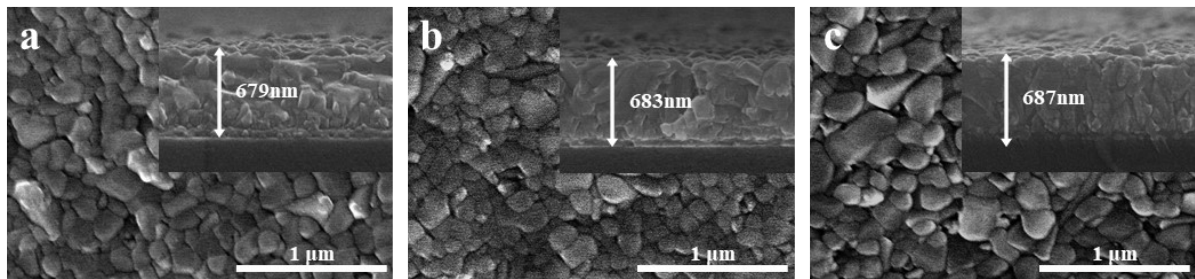

88

89 **Fig. S11** FE-SEM images of top-view of (a)  $150 \text{ BiVO}_4$ , (b)  $200 \text{ BiVO}_4$ , and (c)  $250 \text{ BiVO}_4$ . The inset images show  
90 the corresponding cross-sectional image.

91

92

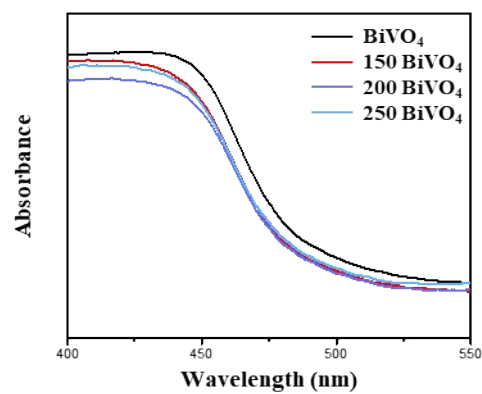

93

94 **Fig. S12** visible absorbance spectra of  $\text{BiVO}_4$  and  $X \text{ BiVO}_4$ .

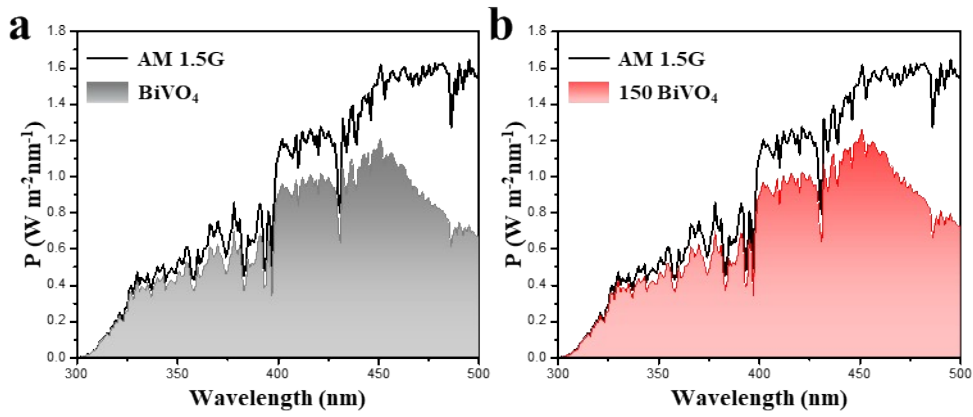

95

96 **Fig. S13** Power of light provided by the solar simulator and light absorbed by (a) BiVO<sub>4</sub> and (b) 150 BiVO<sub>4</sub>.<sup>5,6</sup>

97

98

99 **Table S2** Slope, x-axis intercept, carrier density, and Flat Band potential of BiVO<sub>4</sub> and 150 BiVO<sub>4</sub> calculated by  
100 the Mott-Schottky method.<sup>7</sup>

|                             | Slope                    | x-axis intercept | N <sub>D</sub> (cm <sup>-3</sup> ) | V <sub>FB</sub> (V vs. RHE) |
|-----------------------------|--------------------------|------------------|------------------------------------|-----------------------------|
| <b>BiVO<sub>4</sub></b>     | 1.202 × 10 <sup>13</sup> | 0.194            | 5.87 × 10 <sup>18</sup>            | 0.168                       |
| <b>150 BiVO<sub>4</sub></b> | 6.147 × 10 <sup>12</sup> | 0.178            | 1.15 × 10 <sup>19</sup>            | 0.153                       |

101 Flat band potential (V<sub>FB</sub>) and carrier density (N<sub>D</sub>) of photoanode was calculated based on Mott-Schottky  
102 equation

$$103 \quad \frac{1}{C^2} = \frac{2}{\epsilon\epsilon_0 q N_D A^2} \left( V - V_{FB} - \frac{k_B T}{q} \right)$$

$$104 \quad N_D = \frac{2}{\epsilon\epsilon_0 q A^2 (\text{slope})}$$

$$105 \quad V_{FB} = x - \text{axis intercept} - \frac{K_B T}{q}$$

106 where  $\epsilon$  is the semiconductor dielectric constant (32 for BiVO<sub>4</sub>),  $\epsilon_0$  is the vacuum permittivity constant (8.85 ×  
107 10<sup>-14</sup> F cm<sup>-1</sup>),  $q$  is the elementary charge (1.602 × 10<sup>-19</sup> C),  $A$  is the electrode area (0.25 cm<sup>2</sup>),  $k_B$  is the  
108 Boltzmann constant (1.38 × 10<sup>-23</sup> J K<sup>-1</sup>), and  $T$  is the absolute temperature (298 K).

109

110

111

112

113



114

115 **Table S3** Energy levels of BiVO<sub>4</sub> and 150 BiVO<sub>4</sub> calculated by UPS measurements.<sup>8,9</sup>

|                             | <b>E<sub>cutoff</sub> (eV)</b> | <b>E<sub>onset</sub> (eV)</b> | <b>VBM (eV)</b> | <b>CBM (eV)</b> | <b>WF (eV)</b> |
|-----------------------------|--------------------------------|-------------------------------|-----------------|-----------------|----------------|
| <b>BiVO<sub>4</sub></b>     | 17.4                           | 1.8                           | 5.62            | 3.1             | 3.82           |
| <b>150 BiVO<sub>4</sub></b> | 17.7                           | 2.2                           | 5.72            | 3.19            | 3.52           |

116 To identify the energy level alignment of the photoanode, the ultraviolet photoelectron spectroscopy (UPS)  
 117 measurements were carried out on BiVO<sub>4</sub> and 150 BiVO<sub>4</sub>. The cutoff energy and onset energy were obtained  
 118 by linearly extrapolating the high binding energy and low binding energy, respectively. The valence band  
 119 maximum (VBM) can be computed using the following equation

120 
$$VBM = hv - (E_{cutoff} - E_{onset})$$

121 Where  $hv = 21.22$  eV is the incident photo energy from a He ( I ) source of UPS systems. The conduction band  
 122 minimum (CBM) was deduced from bandgap and VBM. The work function (WF) was calculated using the  
 123 following formulation

124 
$$WF = E_{vacuum} - E_F = hv - E_{cutoff}$$

125 Where  $E_F$  is the Fermi-level. Finally, the relationship between the vacuum energy (V vs. vacuum) and the  
 126 normal electrode potential (V vs. NHE) was provided by  $E_{vacuum} = -E_{NHE} - 4.44$ .

127

128

129 **Table S4** O 1s peak fitting results obtained from XPS analysis.

| <b>Sample</b>               | <b>Oxygen<br/>Atomic %<br/>(At.%)</b> | <b>O<sub>lattice</sub></b> |                 | <b>O<sub>vacancy</sub></b> |                 | <b>O<sub>chemisorbed</sub></b> |                 |
|-----------------------------|---------------------------------------|----------------------------|-----------------|----------------------------|-----------------|--------------------------------|-----------------|
|                             |                                       | <b>BE (eV)</b>             | <b>Area (%)</b> | <b>BE (eV)</b>             | <b>Area (%)</b> | <b>BE (eV)</b>                 | <b>Area (%)</b> |
| <b>BiVO<sub>4</sub></b>     | 56.1                                  | 529.4                      | 56.6            | 530.4                      | 21.2            | 531.6                          | 22.2            |
| <b>150 BiVO<sub>4</sub></b> | 60.02                                 | 529.5                      | 44.3            | 530.3                      | 37.3            | 531.7                          | 18.4            |

130

131

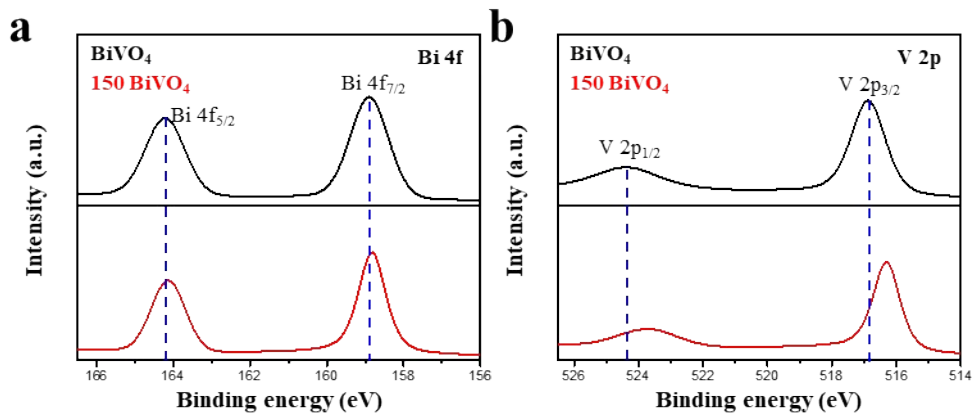

132

133 **Fig. S14** XPS of (a) Bi 4f spectra and (b) V 2p spectra for BiVO<sub>4</sub> and 150 BiVO<sub>4</sub>.

134

135

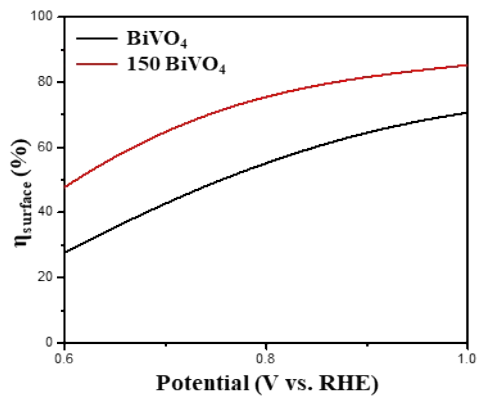

136

137 **Fig. S15** Surface charge injection efficiencies of the BiVO<sub>4</sub> and 150 BiVO<sub>4</sub>.

138

139

140

141

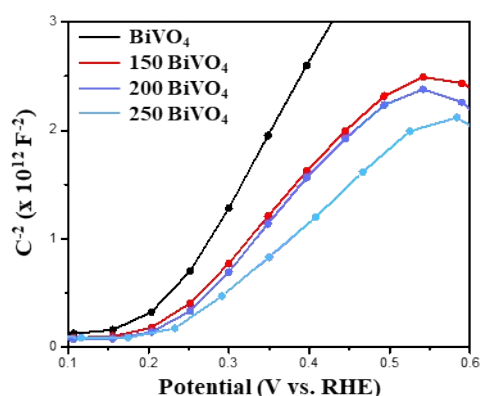

142

143 **Fig. S16** Mott-Schottky plots of  $\text{BiVO}_4$  and  $X \text{BiVO}_4$ .

144

145

146 **Table S5** Summary table of the recent advances in photoelectrochemical glycerol oxidation to  
 147 dihydroxyacetone (DHA).

| Photoanode                                               | Electrolyte                                                            | Potential<br>(V vs. RHE) | Production rate<br>( $\text{mmol m}^{-2}\text{h}^{-1}$ ) | FE<br>(%) | Sel<br>(%) | Ref.      |
|----------------------------------------------------------|------------------------------------------------------------------------|--------------------------|----------------------------------------------------------|-----------|------------|-----------|
| <b>{010}-<math>\text{BiVO}_4</math></b>                  | 0.1M $\text{Na}_2\text{B}_4\text{O}_7$ with<br>0.1M glycerol<br>(pH 2) | 1.1                      | 90                                                       | -         | 60         | 10        |
| <b>MP-<math>\text{BiVO}_4</math></b>                     | 0.5M $\text{Na}_2\text{SO}_4$ with<br>0.1M glycerol<br>(pH 2)          | 1.23                     | 352.2                                                    | 29.1      | 53.7       | 11        |
| <b><math>\text{BiVO}_4/\text{NiCo-LDH-Act}</math></b>    | 0.5M $\text{Na}_2\text{SO}_4$ with<br>0.6M glycerol<br>(pH 2)          | 1.4                      | 205                                                      | -         | 41.93      | 12        |
| <b><math>\text{WO}_3/\text{BiVO}_4/\text{Bi}</math></b>  | 0.5M $\text{Na}_2\text{SO}_4$ with<br>0.1M glycerol<br>(pH 2)          | 1.2                      | 192.69                                                   | 35.3      | 60.6       | 13        |
| <b>Bi rich-<math>\text{BiVO}_{(4-x)}</math></b>          | 0.5M $\text{Na}_2\text{SO}_4$ with<br>0.1M glycerol<br>(pH 2)          | 1.23                     | 361.9                                                    | 46        | 80.3       | 14        |
| <b><math>\text{BiVO}_4/\text{CoO}_x/\text{Au}</math></b> | 0.5M $\text{Na}_2\text{SO}_4$ with<br>0.1M glycerol<br>(pH 2)          | 1.2                      | 339.74                                                   | 40        | 60         | 15        |
| <b>B:<math>\text{NiCoO}_x:\text{BiVO}_4</math></b>       | 0.5M $\text{Na}_2\text{SO}_4$ with<br>0.1M glycerol<br>(pH 2)          | 1.23                     | 228.4                                                    | 34.3      | 30.8       | 16        |
| <b><math>\text{N}_2\text{-BiVO}_4</math></b>             | 0.5M $\text{Na}_2\text{SO}_4$ with<br>0.1M glycerol<br>(pH 2)          | 1.0                      | 160                                                      | 14        | 50.5       | This work |

148

149 **References**

- 150 1. Y. Pei, Z. Pi, H. Zhong, J. Cheng and F. Jin, *Journal of Materials Chemistry A*, 2022, **10**,  
151 1309-1319.
- 152 2. N. Klinova McMillan, D. A. Lopez, G. Leem and B. D. Sherman, *ChemPlusChem*, 2022, **87**,  
153 e202200187.
- 154 3. R. T. Gao, S. Liu, X. Guo, R. Zhang, J. He, X. Liu, T. Nakajima, X. Zhang and L. Wang,  
155 *Advanced Energy Materials*, 2021, **11**, 2102384.
- 156 4. F. M. Toma, J. K. Cooper, V. Kunzelmann, M. T. McDowell, J. Yu, D. M. Larson, N. J. Borys, C.  
157 Abelyan, J. W. Beeman and K. M. Yu, *Nature communications*, 2016, **7**, 12012.
- 158 5. Y. Ma, S. R. Pendlebury, A. Reynal, F. Le Formal and J. R. Durrant, *Chemical Science*, 2014,  
159 **5**, 2964-2973.
- 160 6. J. H. Kim, J. H. Kim, J. W. Jang, J. Y. Kim, S. H. Choi, G. Magesh, J. Lee and J. S. Lee,  
161 *Advanced Energy Materials*, 2015, **5**, 1401933.
- 162 7. M. A. De Araújo, D. Coelho, L. H. Mascaro and E. C. Pereira, *Journal of Solid State*  
163 *Electrochemistry*, 2018, **22**, 1539-1548.
- 164 8. L. Shi, C. Xu, X. Sun, H. Zhang, Z. Liu, X. Qu and F. Du, *Journal of Materials Science*, 2018,  
165 **53**, 11329-11342.
- 166 9. V.-H. Tran, H. Park, S. H. Eom, S. C. Yoon and S.-H. Lee, *ACS omega*, 2018, **3**, 18398-18410.
- 167 10. T.-G. Vo, C.-C. Kao, J.-L. Kuo, C.-c. Chiu and C.-Y. Chiang, *Applied Catalysis B:*  
168 *Environmental*, 2020, **278**, 119303.
- 169 11. C. Lin, C. Dong, S. Kim, Y. Lu, Y. Wang, Z. Yu, Y. Gu, Z. Gu, D. K. Lee and K. Zhang,  
170 *Advanced Materials*, 2023, **35**, 2209955.
- 171 12. Y. Miao, Z. Li, Y. Song, K. Fan, J. Guo, R. Li and M. Shao, *Applied Catalysis B: Environmental*,  
172 2023, **323**, 122147.
- 173 13. X. Feng, X. Feng and F. Zhang, *Journal of Materials Chemistry A*, 2023, **11**, 20242-20253.
- 174 14. Y. Lu, B. G. Lee, C. Lin, T.-K. Liu, Z. Wang, J. Miao, S. H. Oh, K. C. Kim, K. Zhang and J. H.  
175 Park, *Nature communications*, 2024, **15**, 5475.
- 176 15. L. Wang, Z. Chen, Q. Zhao, N. Wen, S. Liang, X. Jiao, Y. Xia and D. Chen, *Advanced*  
177 *Functional Materials*, 2409349.
- 178 16. Z. Kang, Y. Zheng, H. Li, Y. Shen, W. Zhang, M. Huang and X. Tao, *Chemical Engineering*  
179 *Journal*, 2024, 156324.

180
